# Supplementary material
Source: MDPI journal article supplement (https://www.mdpi.com/2311-5637/10/3/128)
Supplement: s1 [file s1]

# Differences in the volatile profile of apple cider fermented with *Schizosaccharomyces pombe* and *Schizosaccharomyces japonicus*

Nicola Ferremi Leali<sup>1</sup>, Elisa Salvetti<sup>1,2</sup>, Giovanni Luzzini<sup>1</sup>, Andrea Salini<sup>1</sup>, Salvatore Fusco<sup>1</sup>, Maurizio Ugliano<sup>1</sup>, Sandra Torriani<sup>1\*</sup>, Renato L. Binati<sup>1</sup>

<sup>1</sup> Department of Biotechnology, University of Verona, Strada Le Grazie 15, 37134 Verona (VR), Italy

<sup>2</sup> Verona University Culture Collection – Dept. of Biotechnology (VUCC-DBT), University of Verona, Strada Le Grazie 15, 37134 Verona (VR), Italy

\* Correspondence: sandra.torriani@univr.it; Tel.: +39-045-8027921

**Supplementary Table S1.** Chemical composition of apple cider fermented with *Schizosaccharomyces pombe* SzpT and Szp, *Schizosaccharomyces japonicus* SzjT and Szj, and *Saccharomyces cerevisiae* Sc at half fermentation. Data are the averages of three independent fermentations. Different letters for the same data series indicate a significant difference in Tukey's HSD test ( $p < 0.05$ ).

N.D.= not detected

| Compound<br>(g/L)          | Strain                    |                           |                           |                           |                           |
|----------------------------|---------------------------|---------------------------|---------------------------|---------------------------|---------------------------|
|                            | SzpT                      | Szp                       | SzjT                      | Szj                       | Sc                        |
| Fructose                   | 41.68 ± 2.47 <sup>a</sup> | 43.64 ± 0.50 <sup>a</sup> | 34.63 ± 2.91 <sup>a</sup> | 37.82 ± 7.19 <sup>a</sup> | 40.24 ± 3.68 <sup>a</sup> |
| Glucose                    | 5.95 ± 2.71 <sup>b</sup>  | 9.47 ± 0.89 <sup>ab</sup> | 8.40 ± 1.00 <sup>ab</sup> | 12.47 ± 2.76 <sup>a</sup> | 5.44 ± 0.96 <sup>b</sup>  |
| Sucrose                    | N.D.                      | N.D.                      | N.D.                      | 1.59 ± 0.36 <sup>a</sup>  | 1.42 ± 0.09 <sup>a</sup>  |
| Citrate                    | N.D.                      | N.D.                      | N.D.                      | N.D.                      | N.D.                      |
| Malate                     | 3.25 ± 0.04 <sup>a</sup>  | 1.64 ± 0.01 <sup>b</sup>  | 0.93 ± 0.01 <sup>d</sup>  | 0.17 ± 0.00 <sup>c</sup>  | 3.25 ± 0.04 <sup>a</sup>  |
| Glycerol                   | 2.77 ± 0.51 <sup>c</sup>  | 3.35 ± 0.42 <sup>c</sup>  | 6.44 ± 0.66 <sup>a</sup>  | 5.04 ± 0.11 <sup>b</sup>  | 2.79 ± 0.31 <sup>c</sup>  |
| Sorbitol                   | N.D.                      | N.D.                      | N.D.                      | N.D.                      | N.D.                      |
| Ethanol<br>(v/v, %)        | 3.65 ± 0.60 <sup>b</sup>  | 4.39 ± 0.51 <sup>ab</sup> | 4.49 ± 0.32 <sup>ab</sup> | 3.80 ± 0.15 <sup>b</sup>  | 5.37 ± 0.56 <sup>a</sup>  |
| pH                         | 3.56 ± 0.04 <sup>c</sup>  | 3.58 ± 0.05 <sup>c</sup>  | 3.58 ± 0.03 <sup>c</sup>  | 4.74 ± 0.10 <sup>a</sup>  | 3.74 ± 0.02 <sup>b</sup>  |
| Ratio Fructose/<br>Glucose | 7.34 ± 1.39 <sup>a</sup>  | 4.63 ± 0.39 <sup>b</sup>  | 4.13 ± 0.18 <sup>b</sup>  | 3.04 ± 0.09 <sup>b</sup>  | 7.49 ± 0.85 <sup>a</sup>  |

**Supplementary Table S2.** Volatile organic compounds ( $\mu\text{g/L}$ ) in apple cider fermented with *Schizosaccharomyces pombe* SzpT and Szp, *Schizosaccharomyces japonicus* SzjT and Szj, and *Saccharomyces cerevisiae* Sc.

| Compound                       | IUPAC Name                   | OD                          | Strain                             |                                    |                                     |                                   |                                     | p- value |
|--------------------------------|------------------------------|-----------------------------|------------------------------------|------------------------------------|-------------------------------------|-----------------------------------|-------------------------------------|----------|
|                                |                              |                             | SzpT                               | Szp                                | SzjT                                | Szj                               | Sc                                  |          |
| <i>Esters</i>                  |                              |                             |                                    |                                    |                                     |                                   |                                     |          |
| ethyl acetate<br>(mg/L)        | ethyl acetate                | Ethereal, fruity,<br>sweet  | 32.58 ± 4.37 <sup>c</sup>          | 17.61 ± 3.91 <sup>c</sup>          | 180.96 ± 14.21 <sup>c</sup>         | 315.44 ±<br>73.07 <sup>a</sup>    | 63.29 ± 3.41 <sup>b</sup>           | 3.05e-06 |
| ethyl butanoate                | ethyl butanoate              | Fruity sweet<br>apple       | 125.4 ± 25.61 <sup>c</sup>         | 104.4 ± 6.17 <sup>c</sup>          | 182.83 ± 4.51 <sup>a</sup>          | 127.73 ±<br>8.33 <sup>c</sup>     | 225.7 ± 9.72 <sup>b</sup>           | 3.05e-06 |
| ethyl hexanoate                | ethyl hexanoate              | Sweet, fruity,<br>pineapple | 127.77 ±<br>24.97 <sup>c</sup>     | 171.7 ± 4.24 <sup>c</sup>          | 148.77 ± 9.52 <sup>c</sup>          | 276.77 ±<br>20.39 <sup>b</sup>    | 448.77 ± 22.06 <sup>a</sup>         | 4.87e-09 |
| ethyl octanoate                | ethyl octanoate              | Fruity, winey,<br>waxy      | 74.23 ± 19.81 <sup>c</sup>         | 137.62 ± 8.63 <sup>b</sup>         | 19.7 ± 0.26 <sup>d</sup>            | 37.5 ± 1.57 <sup>d</sup>          | 526.7 ± 20.57 <sup>a</sup>          | 2.52e-12 |
| ethyl decanoate                | ethyl decanoate              | Sweet, waxy,<br>fruity      | 49.13 ± 25.05 <sup>c</sup>         | 112.42 ± 6.23 <sup>b</sup>         | 101.33 ± 20.1 <sup>b</sup>          | 33.3 ± 2.56 <sup>c</sup>          | 352 ± 23.06 <sup>a</sup>            | 6.05e-09 |
| ethyl di-2<br>hydroxyhexanoate | ethyl 2-<br>hydroxyhexanoate | Sweet, fruity               | 0.57 ± 0.06 <sup>a</sup>           | 0.7 ± 0.1 <sup>a</sup>             | 0.07 ± 0.06 <sup>b</sup>            | 0.03 ± 0.06 <sup>b</sup>          | 0.1 ± 0 <sup>b</sup>                | 2.19e-07 |
| isoamyl acetate                | 3-methylbutyl acetate        | Floral, rose, sweet         | 183.53 ±<br>28.67 <sup>d</sup>     | 145.03 ± 3.28 <sup>d</sup>         | 2166.77 ±<br>254.84 <sup>c</sup>    | 5994.03 ±<br>135.5 <sup>a</sup>   | 774.17 ± 28.26 <sup>b</sup>         | 4.22e-13 |
| 2 phenethyl<br>acetate         | 2-phenylethyl acetate        | Sweet, fruity               | 139.03 ± 1.76 <sup>c</sup>         | 130.98 ± 4.71 <sup>c</sup>         | 1174.47 ±<br>138.86 <sup>a</sup>    | 658.33 ±<br>69.38 <sup>b</sup>    | 196.13 ± 5.41 <sup>c</sup>          | 1.47e-08 |
|                                |                              | Σ <i>ESTERS (mg/L)</i>      | 33.27                              | 18.41                              | 184.75                              | 322.57                            | 65.81                               |          |
| <i>Alcohols</i>                |                              |                             |                                    |                                    |                                     |                                   |                                     |          |
| isoamyl alcohol                | 3-methylbutan-1-ol           | Roasted, spicy,<br>sweet    | 42671.97 ±<br>4821.3 <sup>cd</sup> | 24884.02 ±<br>2162.82 <sup>d</sup> | 177672.2 ±<br>10105.07 <sup>b</sup> | 247762.43 ±<br>15190 <sup>a</sup> | 71098.37 ±<br>15597.49 <sup>c</sup> | 8.82e-10 |
| 1 pentanol                     | pentan-1-ol                  | Sweet solvent,<br>fusel     | 92.4 ± 4.99 <sup>ab</sup>          | 91.49 ± 6.86 <sup>ab</sup>         | 45.57 ± 5.02 <sup>c</sup>           | 111.87 ±<br>2.94 <sup>a</sup>     | 70.63 ± 19.58 <sup>bc</sup>         | 0.000103 |
| 1 hexanol                      | hexan-1-ol                   | Sweet, resin,<br>ether      | 2031 ± 14.05 <sup>a</sup>          | 1884.05 ±<br>191.28 <sup>ab</sup>  | 926.53 ± 143.59 <sup>c</sup>        | 1953.57 ±<br>103.57 <sup>ab</sup> | 1612.53 ±<br>117.49 <sup>b</sup>    | 5.66e-06 |
| benzyl alcohol                 | phenylmethanol               | Floral, rose,<br>phenolic   | 51.7 ± 19.92 <sup>b</sup>          | 46.14 ± 19.61 <sup>b</sup>         | 41.9 ± 3.21 <sup>b</sup>            | 96.5 ± 3.05 <sup>a</sup>          | 17.27 ± 6.18 <sup>b</sup>           | 0.000332 |
| phenylethyl<br>alcohol         | 2-phenylethanol              | Sweet, floral,<br>fresh     | 2876.27 ±<br>502.83 <sup>c</sup>   | 2727.31 ±<br>143.16 <sup>c</sup>   | 6195.87 ±<br>515.27 <sup>a</sup>    | 4842.67 ±<br>274.79 <sup>b</sup>  | 3432.67 ±<br>220.25 <sup>c</sup>    | 1.49e-06 |
|                                |                              | Σ <i>ALCOHOLS</i>           | 47723.34                           | 2457.01                            | 184882.07                           | 254767.04                         | 76231.47                            |          |

|                         |                                                  |                          |                                |                                |                               |                               |                                |          |
|-------------------------|--------------------------------------------------|--------------------------|--------------------------------|--------------------------------|-------------------------------|-------------------------------|--------------------------------|----------|
| <i>Terpenes</i>         |                                                  |                          |                                |                                |                               |                               |                                |          |
| β-myrcene               | 7-methyl-3-methylideneocta-1,6-diene             | Peppery, terpenic, spicy | 1.04 ± 0.43 <sup>b</sup>       | 0.79 ± 0.16 <sup>b</sup>       | 0.97 ± 0.25 <sup>b</sup>      | 1.47 ± 0.27 <sup>b</sup>      | 2.33 ± 0.29 <sup>a</sup>       | 0.000566 |
| limonene                | 1-methyl-4-prop-1-en-2-ylcyclohexene             | Citrus, orange, fresh    | 0.35 ± 0.06 <sup>ab</sup>      | 0.33 ± 0.09 <sup>b</sup>       | 0.32 ± 0.06 <sup>b</sup>      | 0.51 ± 0.06 <sup>ab</sup>     | 0.63 ± 0.19 <sup>a</sup>       | 0.0183   |
| linalool                | 3,7-dimethylocta-1,6-dien-3-ol                   | Citrus, floral, sweet    | 4.37 ± 0.53 <sup>ab</sup>      | 4.33 ± 0.61 <sup>b</sup>       | 2.28 ± 0.4 <sup>c</sup>       | 1.92 ± 0.21 <sup>c</sup>      | 5.67 ± 0.58 <sup>a</sup>       | 1.3e-05  |
| α-terpineol             | 2-(4-methylcyclohex-3-en-1-yl) propan-2-ol       | Woody, terpenic, lemon   | 0.25 ± 0.03 <sup>b</sup>       | 0.24 ± 0.06 <sup>b</sup>       | 0.22 ± 0.02 <sup>b</sup>      | 0.16 ± 0.03 <sup>b</sup>      | 0.39 ± 0.06 <sup>a</sup>       | 0.000759 |
| geraniol                | (2E)-3,7-dimethylocta-2,6-dien-1-ol              | Sweet, floral, fruity    | 1.26 ± 0.37 <sup>b</sup>       | 2.28 ± 0.47 <sup>ab</sup>      | 1.33 ± 0.18 <sup>b</sup>      | 1.83 ± 0.55 <sup>ab</sup>     | 3.04 ± 0.57 <sup>a</sup>       | 0.00364  |
| nerolidol 2             | (3S,6Z)-3,7,11-trimethyldodeca-1,6,10-trien-3-ol | Mild, floral             | 0.82 ± 0.42 <sup>b</sup>       | 0.85 ± 0.06 <sup>b</sup>       | 0.79 ± 0.1 <sup>b</sup>       | 0 ± 0 <sup>b</sup>            | 2.58 ± 0.74 <sup>a</sup>       | 0.000137 |
| Σ TERPENES              |                                                  |                          | 8.09                           | 8.82                           | 5.91                          | 5.89                          | 14.64                          |          |
| <i>Fatty acids</i>      |                                                  |                          |                                |                                |                               |                               |                                |          |
| hexanoic acid           | hexanoic acid                                    | Sour, fatty, sweaty      | 1803.7 ± 160.44 <sup>d</sup>   | 2721.14 ± 147.14 <sup>c</sup>  | 3102.1 ± 142.53 <sup>c</sup>  | 8040.03 ± 208.39 <sup>a</sup> | 4510.27 ± 99.93 <sup>b</sup>   | 2.62e-12 |
| octanoic acid           | octanoic acid                                    | Fatty, waxy, rancid      | 10806.03 ± 678.07 <sup>c</sup> | 14036.47 ± 776.31 <sup>b</sup> | 2040.5 ± 285.69 <sup>d</sup>  | 2145 ± 201.12 <sup>d</sup>    | 25047.97 ± 855.22 <sup>a</sup> | 3.08e-12 |
| 3-methylbutanoic acid   | 3-methylbutanoic acid                            | Tropical, acid, sweaty   | 16.27 ± 0.95 <sup>b</sup>      | 34.37 ± 2.05 <sup>b</sup>      | 2362.73 ± 436.96 <sup>a</sup> | 300.07 ± 34.11 <sup>b</sup>   | 304.6 ± 106.66 <sup>b</sup>    | 2.37e-07 |
| Σ FATTY ACIDS           |                                                  |                          | 12662.00                       | 16791.98                       | 7505.33                       | 10485.1                       | 29862.84                       |          |
| <i>Sulphur compound</i> |                                                  |                          |                                |                                |                               |                               |                                |          |
| methionol               | 3-methylsulfanylpropan-1-ol                      | Vegetable, sulphurous    | 731.9 ± 85.81 <sup>b</sup>     | 562.74 ± 25.93 <sup>b</sup>    | 3726.5 ± 715.89 <sup>a</sup>  | 954.5 ± 190.19 <sup>b</sup>   | 861.87 ± 282.41 <sup>b</sup>   | 3.39e-06 |
| <i>Benzenoid</i>        |                                                  |                          |                                |                                |                               |                               |                                |          |
| methyl salicylate       | methyl 2-hydroxybenzoate                         | Vanilla, spices, herbal  | 0.21 ± 0.05 <sup>c</sup>       | 0.21 ± 0.04 <sup>c</sup>       | 0.28 ± 0.04 <sup>bc</sup>     | 0.80 ± 0.15 <sup>b</sup>      | 1.52 ± 0.41 <sup>a</sup>       | 3.53e-05 |
| 4-vinyl guaiacol        | 2-methoxy-4-(prop-1-en-1-yl) phenol              | Spicy, clove-like        | 3.33 ± 0.43 <sup>a</sup>       | 4.11 ± 1.92 <sup>a</sup>       | 11.79 ± 5.62 <sup>a</sup>     | 13.20 ± 2.79 <sup>a</sup>     | 150.21 ± 7.25 <sup>b</sup>     | 0.000179 |

|                                        |                                                                           |                                            |                          |                          |                          |                          |                             |          |
|----------------------------------------|---------------------------------------------------------------------------|--------------------------------------------|--------------------------|--------------------------|--------------------------|--------------------------|-----------------------------|----------|
| 4-vinyl phenol                         | 4-Ethenylphenol                                                           | Phenolic,pungent,<br>and slightly<br>sweet | 2.97 ± 0.69 <sup>a</sup> | 3.82 ± 0.98 <sup>a</sup> | 5.85 ± 4.58 <sup>a</sup> | 5.05 ± 0.68 <sup>a</sup> | 375.88 ± 12.17 <sup>b</sup> | 7.01e-15 |
| 4-ethyl guaiacol                       | 4-ethyl-2-<br>methoxyphenol                                               | Smoky, spicy,<br>and phenolic              | 0.01 ± 0.02 <sup>a</sup> | 0.03 ± 0.01 <sup>a</sup> | 0 ± 0 <sup>a</sup>       | 0.22 ± 0.03 <sup>b</sup> | 0.06 ± 0.01 <sup>a</sup>    | 1.64e-07 |
| 4- ethyl phenol                        | para-ethylphenol                                                          | Strong, phenolic,<br>smoky                 | 0.12 ± 0.09 <sup>1</sup> | 0 ± 0 <sup>a</sup>       | 0.08 ± 0.08 <sup>a</sup> | 0 ± 0 <sup>a</sup>       | 0 ± 0 <sup>a</sup>          | 0.0581   |
| <i>Norisoprenoids</i><br>β-damascenone | (E)-1-(2,6,6-<br>trimethylcyclohexa-<br>1,3-dien-1-yl) but-2-en-<br>1-one | Natural, sweet,<br>fruity                  | 0.72 ± 0.12 <sup>b</sup> | 1.04 ± 0.04 <sup>b</sup> | 0.82 ± 0.13 <sup>b</sup> | 0.66 ± 0.10 <sup>b</sup> | 2.49 ± 0.69 <sup>a</sup>    | 0.000179 |

Mean ± standard deviation values of three independent replicates are indicated. Different letters in each row indicate significant difference according to HSD Tukey test (p<0.05).  
OD = Odour Descriptor
